# Supplementary material
Source: Elsevier journal article supplement (https://rcastoragev2.blob.core.windows.net/82a0511a9bfa625b26f8432e1bbc7668/mmc1.pdf)
Supplement: mmc1 [file mmc1.pdf]

**Supplemental Information**

**PTBP1-Mediated Alternative Splicing**

**Regulates the Inflammatory Secretome**

**and the Pro-tumorigenic Effects of Senescent Cells**

**Athena Georgilis, Sabrina Klotz, Christopher J. Hanley, Nicolas Herranz, Benedikt Weirich, Beatriz Moranco, Ana Carolina Leote, Luana D'Artista, Suchira Gallage, Marco Seehawer, Thomas Carroll, Gopuraja Dharmalingam, Keng Boon Wee, Marco Mellone, Joaquim Pombo, Danijela Heide, Ernesto Guccione, Joaquín Arribas, Nuno L. Barbosa-Morais, Mathias Heikenwalder, Gareth J. Thomas, Lars Zender, and Jesús Gil**

A

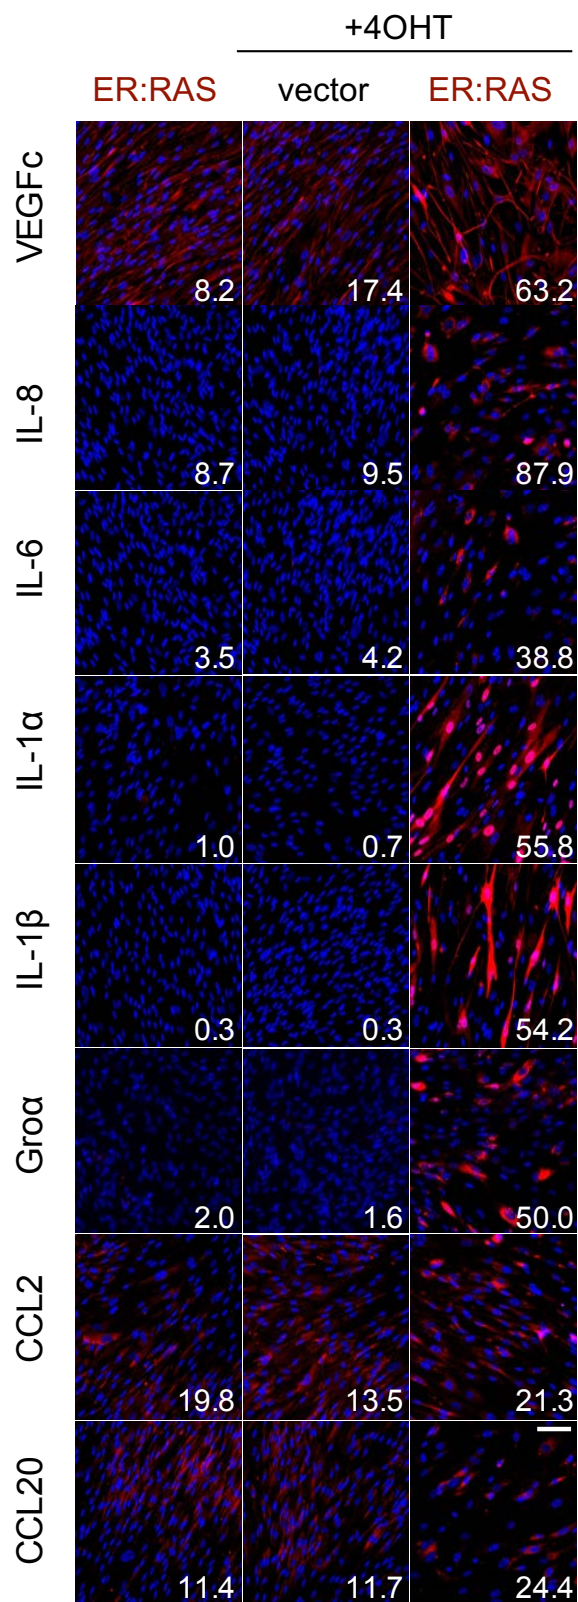

B

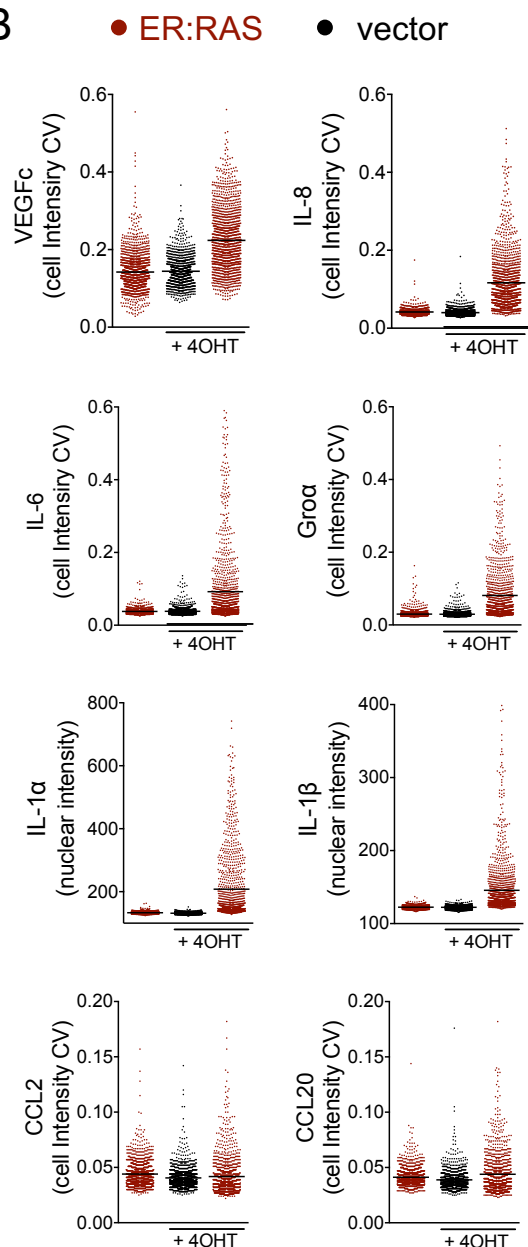

C

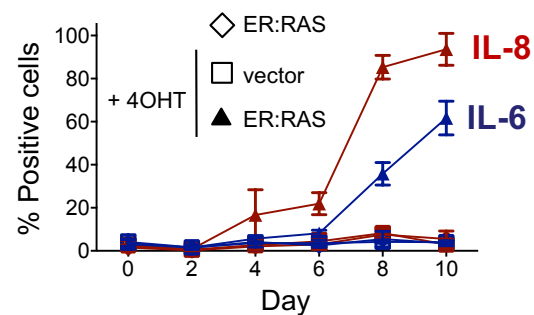

D

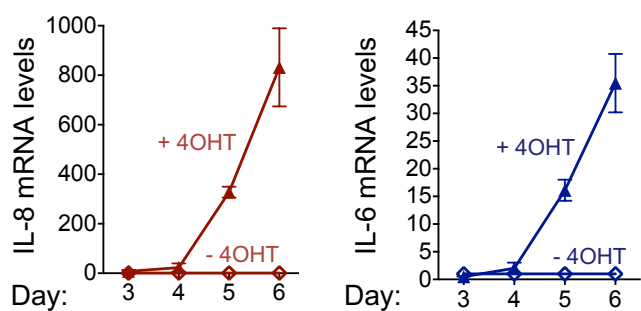

E

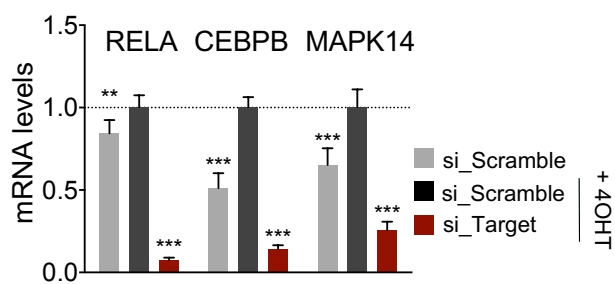

**Figure S1, related to Figure 1. IL-8 and IL-6 as readouts for a SASP screen.**

(A) Representative IF images of the indicated SASP markers (red) co-stained with DAPI (blue) in IMR90 vector or IMR90 ER:RAS cells treated with 4OHT for 8 days. Percentage of cells positive for the indicated marker for each sample is given at the bottom right of each image and is a mean of 3 replicate wells of a single experiment. Scale bar: 100  $\mu$ m. (B) Distribution of single cell intensities of each marker within each condition from (A) in a single sample-well of a 96-well plate. (C) Time-course of IL-8 and IL-6 measured by quantitative IF in IMR90 vector or IMR90 ER:RAS cells. Day 0 = day of 4OHT induction. Values are mean $\pm$ SD from 3 replicate wells of a single experiment. (D) Time-course of IL-8 and IL-6 measured by RT-qPCR in IMR90 ER:RAS cells. For each time-point the conditions were normalized to IMR90 ER:RAS not treated with 4OHT. Data represent mean $\pm$ SD (n=3). (E) mRNA analysis by RT-qPCR of indicated known SASP regulators 5 days after 4OHT induction of IMR90 ER:RAS cells transfected with siRNAs targeting the indicated genes, normalized and compared to si\_Scramble + 4OHT. Data represent mean $\pm$ SD (n=4); \*\*p < 0.01, \*\*\*p < 0.001. Two-way ANOVA (Dunnett's test).

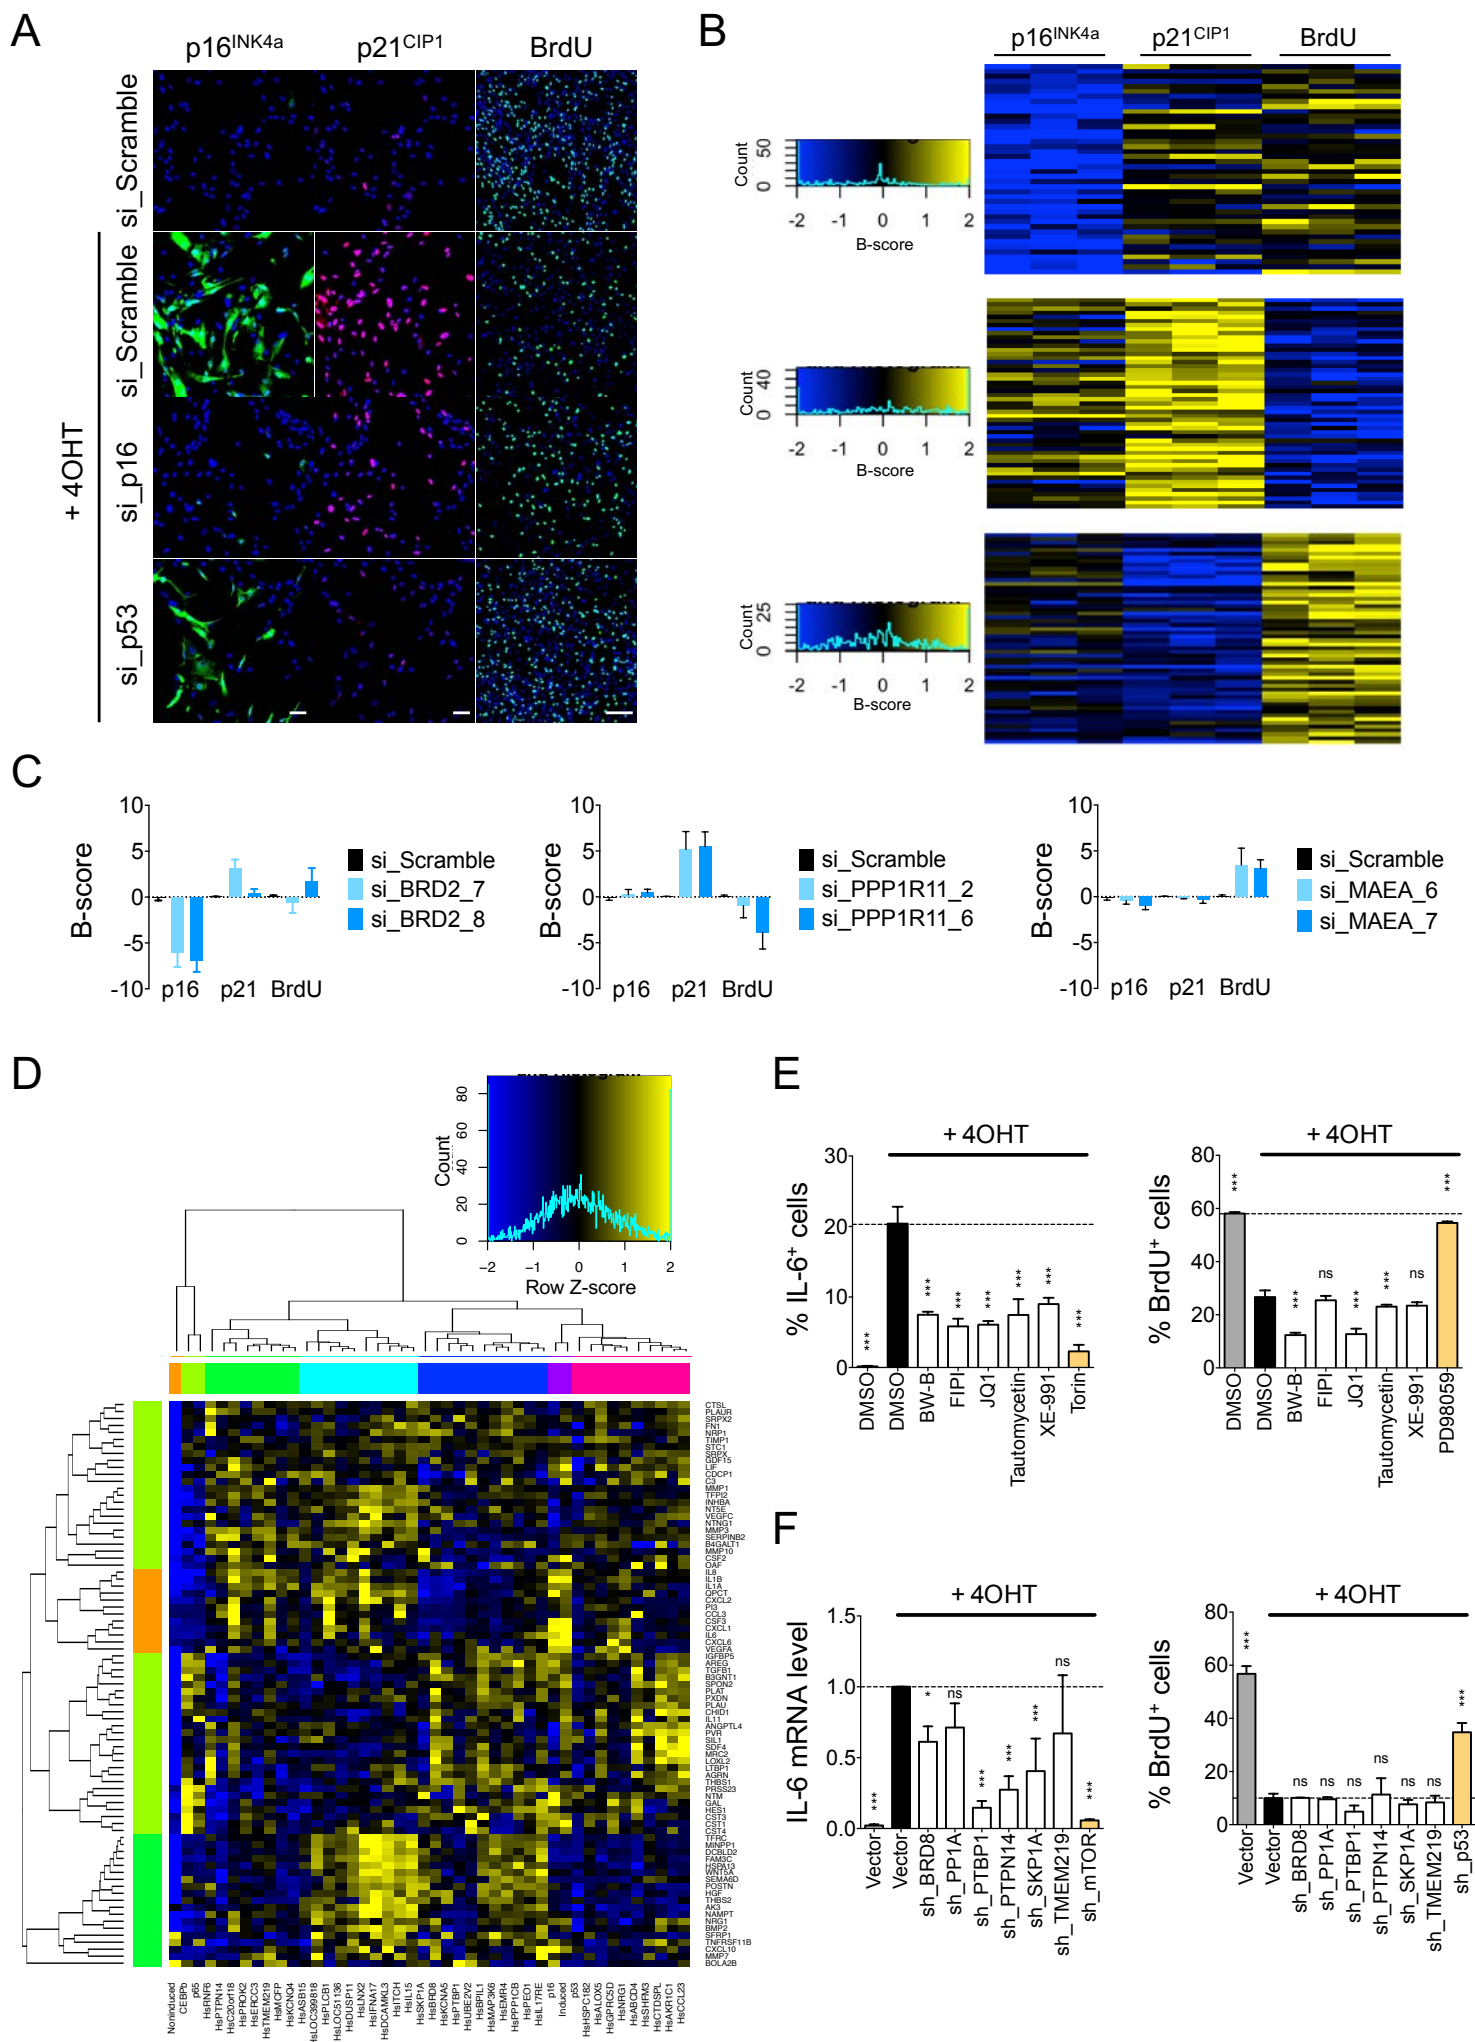

**Figure S2, related to Figure 2. A subset of the screen candidate genes regulates the SASP but not the senescence arrest.**

(A) Representative IF images of the indicated senescence markers following knockdown of known senescence regulators. Scale bar: 50  $\mu\text{m}$  (p16<sup>INK4A</sup> and p21<sup>CIP1</sup>) and 200  $\mu\text{m}$  (BrdU). (B) *K*-means clustering of the SASP-repressing siRNAs. Heatmap of cluster 2 (top), 3 (middle) and 4 (bottom) showing B-score expression for each replicate experiment (column). Each row reflects the measures from one siRNA. (C) B-scores of 2 independent siRNAs targeting genes representative of cluster 2 (left), 3 (middle) and 4 (right). Mean  $\pm$ SD. (D) A detailed diagram of Figure 2D, left, showing 38 genes and additional controls clustering according to expression of the indicated SASP components. (E) IF analysis of IL-6 or BrdU incorporation 8 or 5 days after 4OHT induction, respectively, and treated with DMSO or 6 chemical compounds. Orange bars represent controls, either treatment with 25 nM Torin1 (to prevent IL-6 induction), or treatment with 20  $\mu\text{M}$  PD98059 to prevent growth arrest (resulting in higher BrdU incorporation). Data represent mean $\pm$ SD (n=3); \*\*\*p < 0.001; ns, not significant. Comparisons to DMSO + 4OHT. (F) Expression levels of IL-6 measured by RT-qPCR (left) and IF analysis of BrdU incorporation (right) 6 days after 4OHT induction of IMR90 ER:RAS cells that were stably infected with the indicated pGIPZ vectors. Orange bars represent controls, either shmTOR (that prevents IL-6 induction) or shp53 (that blunts growth arrest, resulting in higher BrdU incorporation). Data represent mean $\pm$ SD (n=3); \*p < 0.05, \*\*\*p < 0.001. Comparisons to Vector + 4OHT. One-way ANOVA (Bonferroni test) was used in (E) and (F) to calculate statistical significance.

**Table S1, related to Figure 2. Genes present in cluster 1 with  $\geq 2$  siRNAs.**

| <b>Genes</b>     |
|------------------|
| <i>ABCD4</i>     |
| <i>AKR1C1</i>    |
| <i>ALOX5</i>     |
| <i>ASB15</i>     |
| <i>BPIL1</i>     |
| <i>BRD4</i>      |
| <i>BRD8</i>      |
| <i>C20orf18</i>  |
| <i>CBR3</i>      |
| <i>CCL23</i>     |
| <i>CTDSPL</i>    |
| <i>CYP20A1</i>   |
| <i>DCAMKL3</i>   |
| <i>DCK</i>       |
| <i>DUSP10</i>    |
| <i>EMR4</i>      |
| <i>ERCC3</i>     |
| <i>GPR133</i>    |
| <i>GPRC5D</i>    |
| <i>HSPC182</i>   |
| <i>IFNA17</i>    |
| <i>IL15</i>      |
| <i>IL17RE</i>    |
| <i>ITCH</i>      |
| <i>ITGB2</i>     |
| <i>KCNA5</i>     |
| <i>KCNQ4</i>     |
| <i>LNX2</i>      |
| <i>LOC399818</i> |
| <i>LOC51136</i>  |
| <i>MAP3K6</i>    |
| <i>MCFP</i>      |
| <i>NRG1</i>      |
| <i>PEO1</i>      |
| <i>PHF6</i>      |
| <i>PLCB1</i>     |
| <i>PPP1CB</i>    |
| <i>PROK2</i>     |
| <i>PTBP1</i>     |
| <i>PTPN14</i>    |
| <i>RNF6</i>      |
| <i>SACM1L</i>    |
| <i>SERPINB2</i>  |
| <i>SHFM3</i>     |

SKP1A  
TLR3  
TMEM219  
TRIM17  
UBE2V2  
UNG

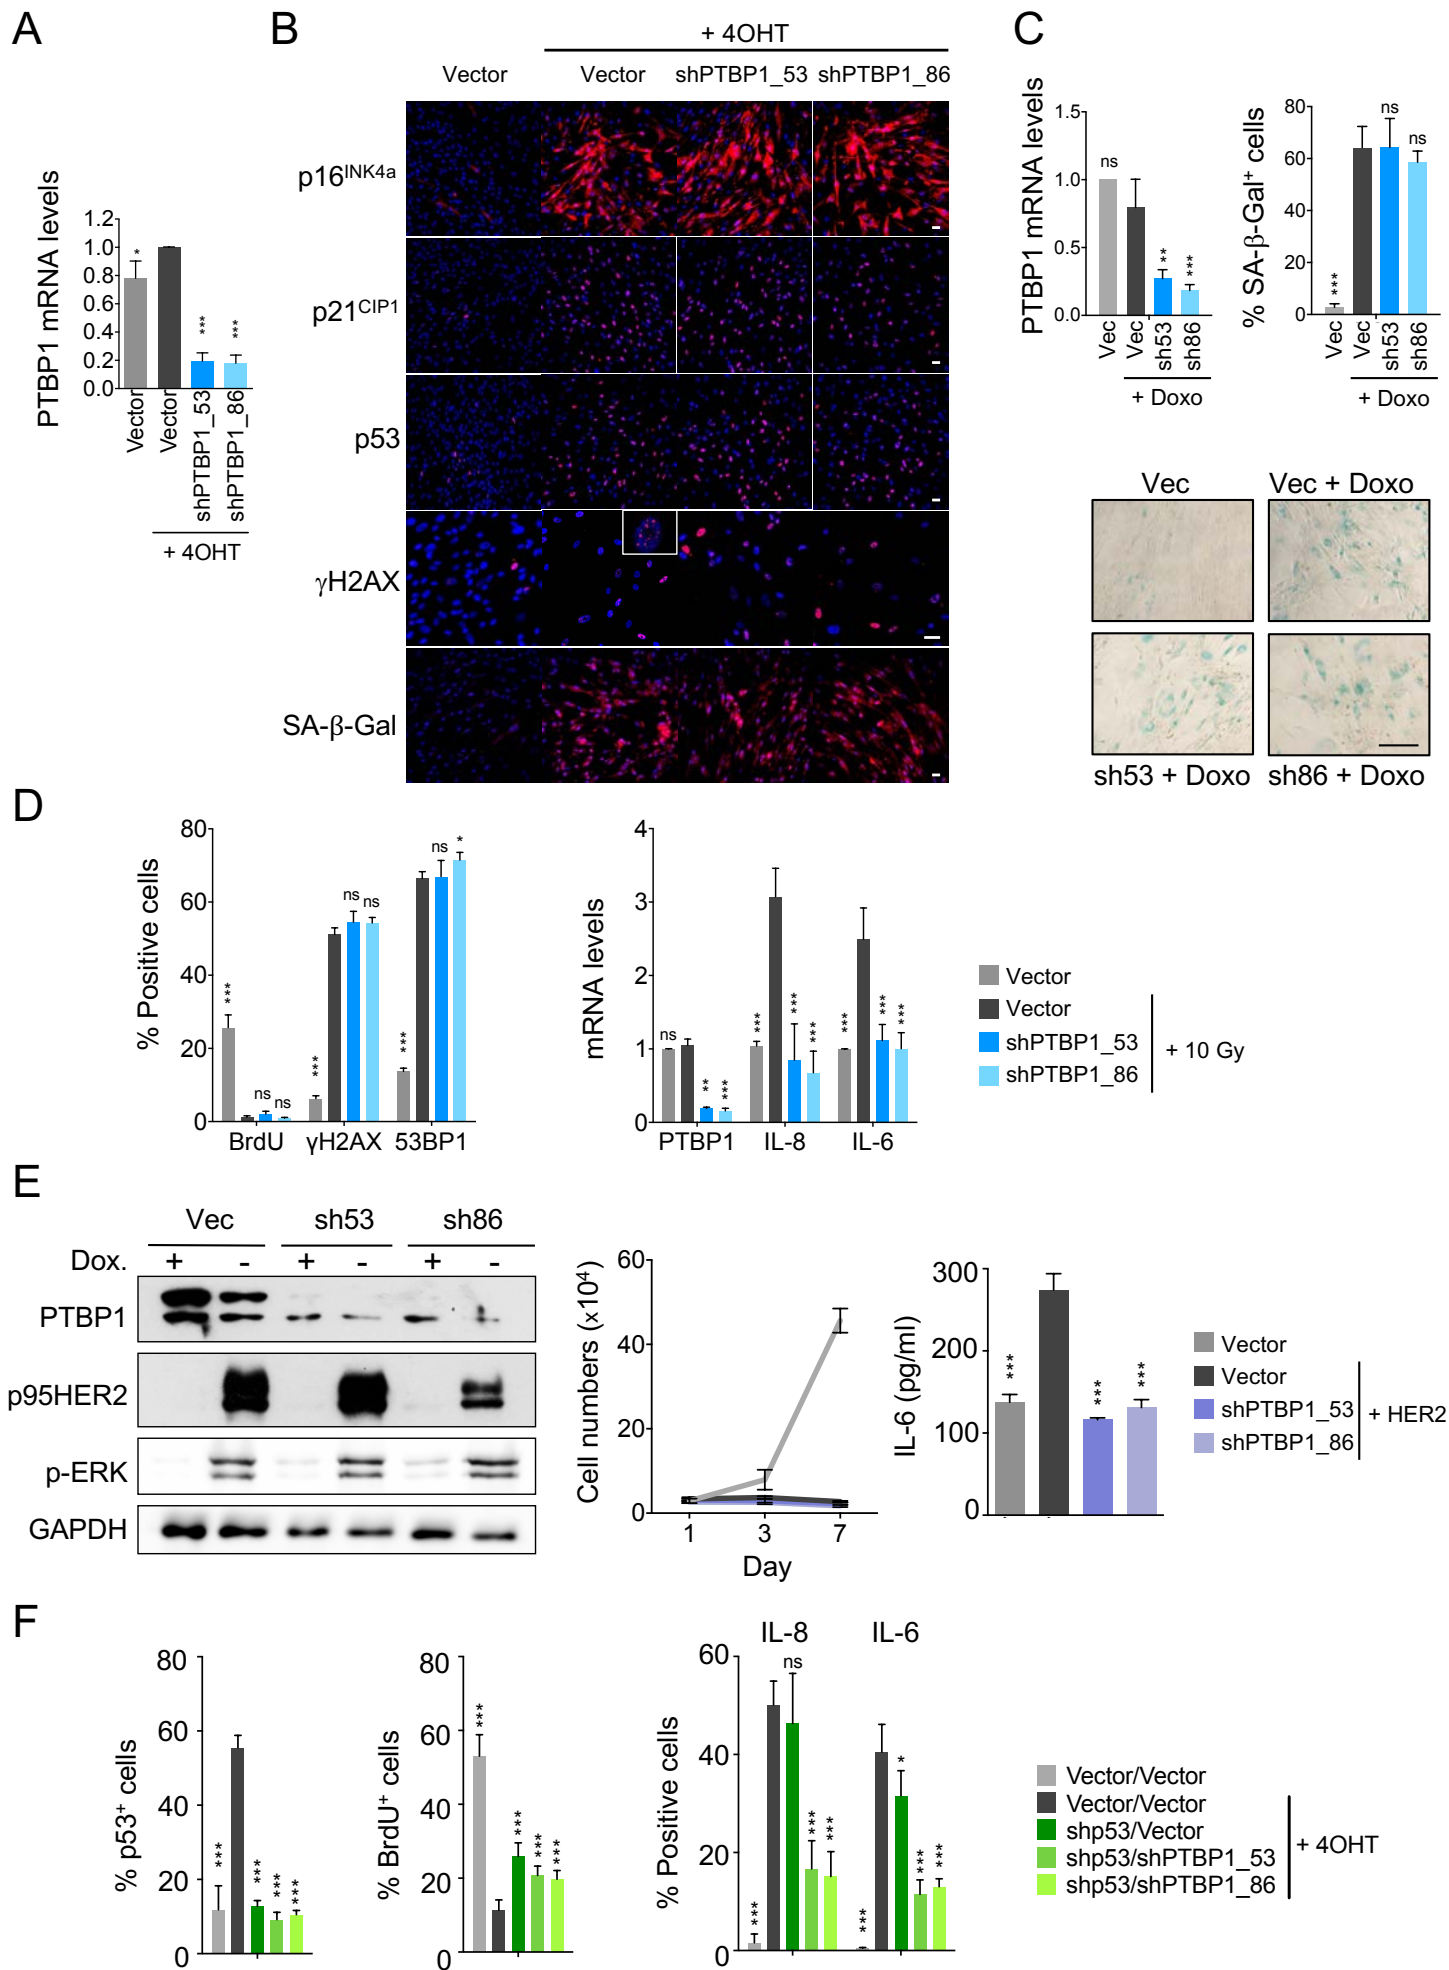



**Figure S3, related to Figure 3. PTBP1 regulates the SASP without affecting growth arrest.**

(A) RT-qPCR analysis of PTBP1 expression 6 days after 4OHT induction of IMR90 ER:RAS cells infected with indicated pGIPz shRNA vectors, normalized and compared to Vector + 4OHT. Data represent mean $\pm$ SD (n=3); \*p < 0.05, \*\*\*p < 0.001. One-way ANOVA (Dunnett's test). (B) Representative IF images of the indicated senescence markers upon PTBP1 knockdown. Scale bar: 50  $\mu$ m. (C) PTBP1 depletion in IMR90 cells undergoing doxorubicin-induced senescence. RT-qPCR analysis of PTBP1 expression (top left), normalized and compared to Vector + 4OHT. Quantification of SA- $\beta$ -Galactosidase expression (top right) and representative images (bottom) 8 days after doxorubicin treatment. Data represent mean $\pm$ SD (n=3); \*\*p < 0.01, \*\*\*p < 0.001; ns, not significant,. One-way ANOVA (Dunnett's test). Scale bar: 100  $\mu$ m. (D) HFFF2 cells were infected with indicated pGIPZ empty vector or PTBP1 shRNAs and irradiated to induce senescence. Left: IF analysis of BrdU incorporation and DDR markers 5 days after irradiation. Right: RT-qPCR analysis of the indicated genes 9 days after irradiation, normalized to Vector. Data represent mean $\pm$ SD (n=3); \*p < 0.05, \*\*p < 0.01, \*\*\*p < 0.001; ns, not significant. Comparisons to Vector + 10 Gy. Two-way ANOVA (Dunnett's test). (E) MCF7 Tet-Off/p95HER2 cells were infected with indicated pGIPZ empty vector or PTBP1 shRNAs and treated with doxycycline to prevent p95HER2-induced senescence. Left: Immunoblot of protein extracts to monitor PTBP1 knockdown, p95HER2 expression and ERK signaling activation 7 days after doxycycline removal. Middle: Growth arrest assessed by cell numbers at indicated days after doxycycline removal. Data represent mean $\pm$ SD (n=3). Right: IL-6 levels assessed by ELISA of media conditioned for 7 days after doxycycline removal. Data represent mean $\pm$ SD (n=3); \*\*\*p < 0.001. Comparisons to Vector + HER2 (+ doxycycline). One-way ANOVA (Bonferroni test). (F) IMR90 ER:RAS cells were stably infected with the indicated vectors 1:1 to monitor PTBP1 knockdown in shp53-mediated bypass of senescence growth arrest. Left and middle: IF analysis of p53 expression and BrdU incorporation 6 days after 4OHT treatment. Right: IF analysis of SASP 8 days after 4OHT treatment. Data represent mean $\pm$ SD (n=3); \*p < 0.05, \*\*\*p < 0.001; ns, not significant. Comparison to Vector/Vector + 4OHT. One-way ANOVA (Dunnett's test).

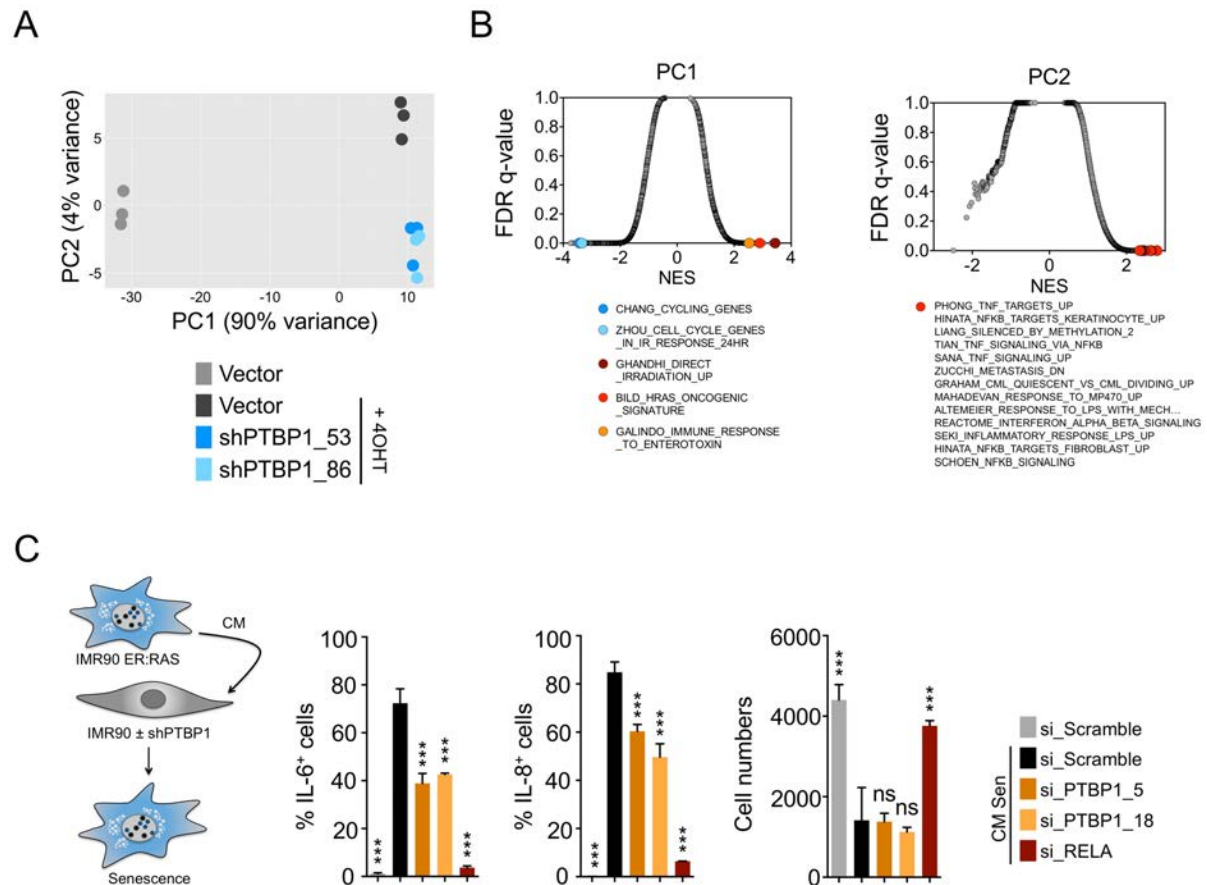

**Figure S4, related to Figure 4. PTBP1 knockdown inhibits SASP-mediated effects.**

(A – B) Global transcriptional profiling of PTBP1 depleted cells. PCA of the expression of the top 1,000 genes in proliferating cells, senescent cells and senescent cells lacking PTBP1. Each dot represents one of 3 independent replicates (A). The PCA axis separating the 4OHT treated samples from the proliferating samples (PC1) is significantly enriched in signatures associated with senescence and significantly depleted of signatures associated with proliferation. The PCA axis separating vector from shPTBP1 samples (PC2) is significantly depleted of signatures associated with inflammatory factors (represented by red dots). (C) SASP and growth arrest in paracrine senescence following PTBP1 depletion. Experimental design (left). IMR90 cells were transfected with indicated siRNAs and after 2 days treated with media conditioned by the specified senescent states. The SASP was assessed by quantitative IF and the growth arrest by cell numbers. Data represent mean±SD (n=3); \*\*\*p < 0.001; ns, not significant. Comparisons to si\_Scramble + senescent cell CM. One-way ANOVA (Dunnett's test).

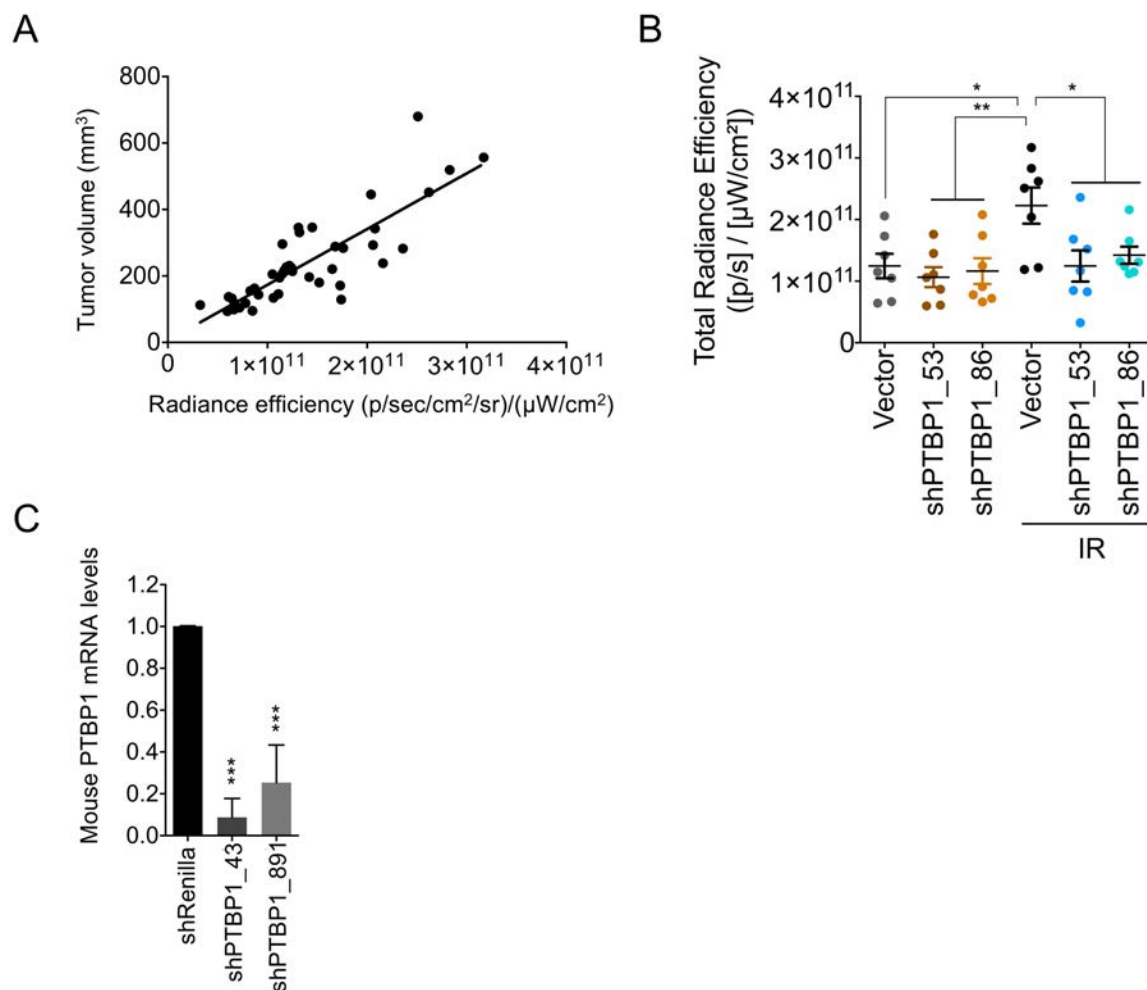

**Figure S5, related to Figure 5. PTBP1 knockdown inhibits SASP-mediated tumor promotion.**

(A) Comparison of tumor volume measurements using caliper (y-axis) and IVIS readings (x-axis). Linear regression:  $R^2 = 0.6913$ ,  $p < 0.0001$ . Each graph symbol corresponds to the measurement of a single mouse ( $n=42$  mice total). (B) Tumor growth measured by radiance efficiency at endpoint. Each graph symbol corresponds to the measurement of a single mouse ( $n=7$  per group). \* $p < 0.05$ , \*\* $p < 0.01$ . Comparisons to Vector/IR. One-way ANOVA (Dunnett's test). (C) RT-qPCR analysis of mouse PTBP1 in MEFs (Mouse Embryonic Fibroblasts) stably infected with the two distinct PTBP1-targeting shRNAs. Data represent mean $\pm$ SD ( $n=3$ ); \*\*\* $p < 0.001$ . Comparison to shRenilla. One-way ANOVA (Dunnett's test).

**A**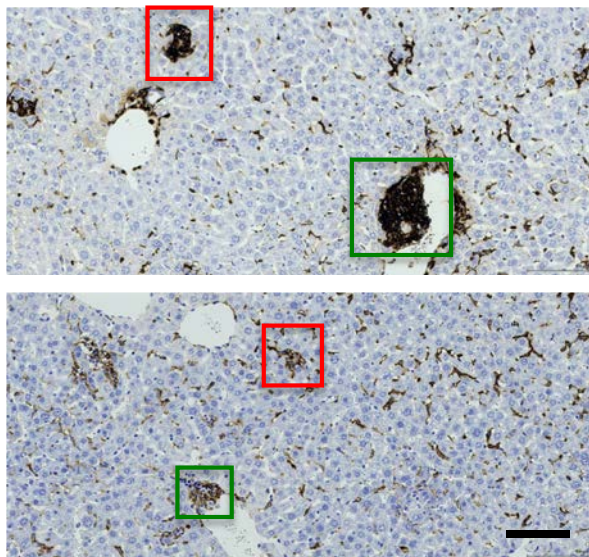**B**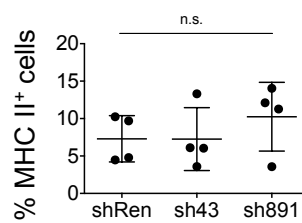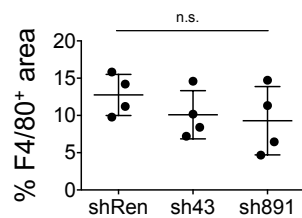**C**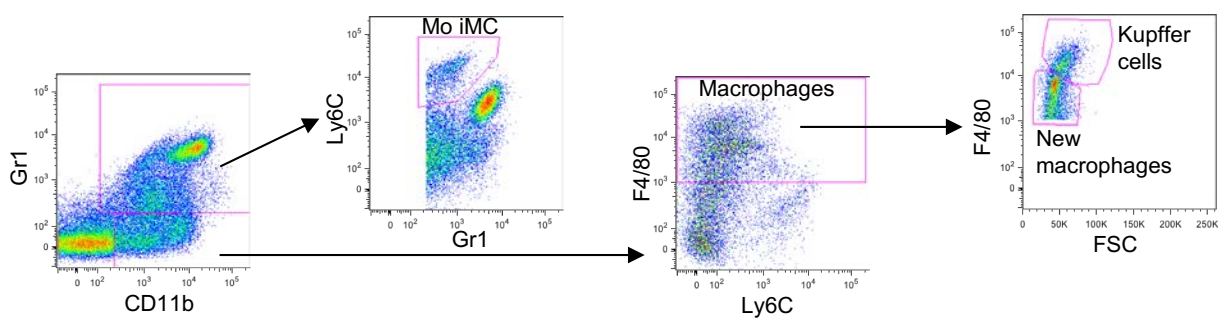**D**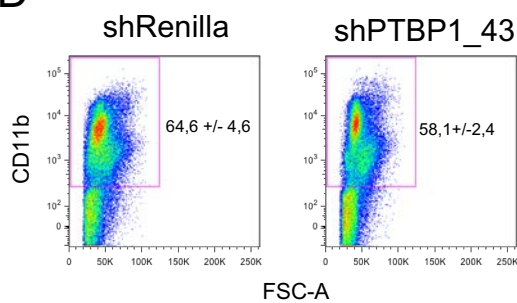**E**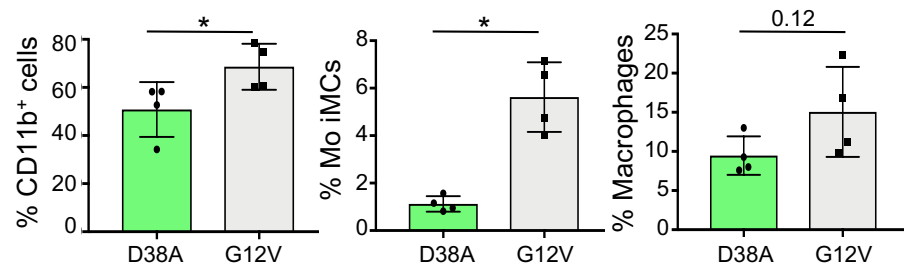**F**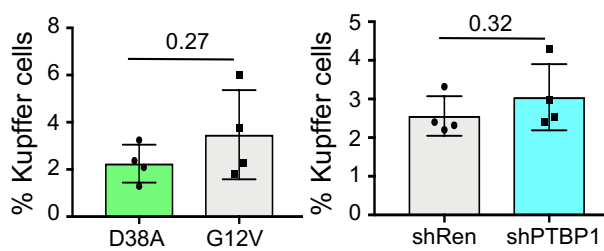**G**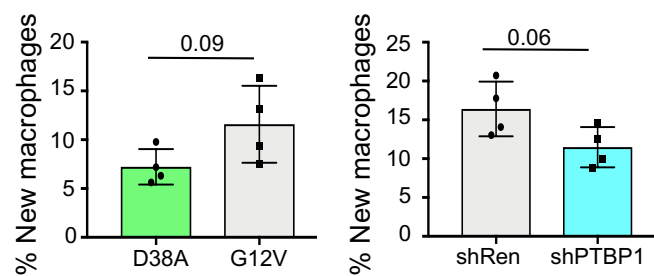**H**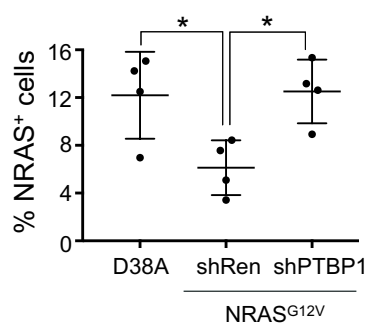**I**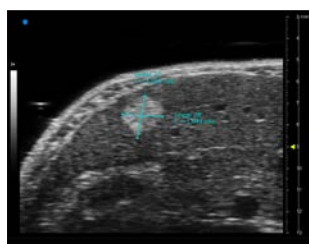**J**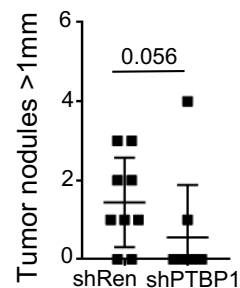

**Figure S6, related to Figure 6. PTBP1 knockdown affects immune infiltration without increasing tumorigenesis.**

(A – B) Analysis of liver infiltrating immune cells by IHC. IHC stained for MHC II and F4/80 in liver sections of shRenilla control with characteristic myeloid aggregate formation. The green box exemplifies big plaques (MHC II >70  $\mu\text{m}$ ; F4/80 >40  $\mu\text{m}$ ) and the red box exemplifies small plaques (MHC II 40 - 70  $\mu\text{m}$ ; F4/80 30 - 40  $\mu\text{m}$ ). Scale Bar: 100  $\mu\text{m}$  (A). Relative densitometric measurement of whole MHC II and F4/80 IHC stained liver sections. Here the total positive area is measured as opposed to number of size-separated aggregates given in Figure 4C. Data represent mean $\pm$ SD (n=4 mice per condition); ns, not significant. Comparisons to NRAS<sup>G12V</sup>\_shRenilla (B). (C – G) Analysis of liver infiltrating immune cells by flow cytometry. Representative dot plots and gating strategy of monocytic iMC, macrophages, Kupffer cells and infiltrating new macrophages. Macrophages can be distinguished in liver resident Kupffer cells (F4/80<sup>high</sup>) and infiltrating new macrophages (F4/80<sup>+</sup>) (C). Representative dot plots of infiltrating CD11b<sup>+</sup> myeloid cells in Ras<sup>G12V</sup>\_shRen and Ras<sup>G12V</sup>\_shPTBP1.43 (D). Quantification of indicated infiltrating cells (E). Quantification of Kupffer cells (F). Quantification of new macrophages (G). (E – G) Data represent mean $\pm$ SD (n=4 mice per condition); \*p < 0.05. (H) Quantification of NRAS<sup>+</sup> cells in NRAS<sup>G12V, D38A</sup> (n=4), NRAS<sup>G12V</sup>\_shRen (n=4) and NRAS<sup>G12V</sup>\_shPTBP1 (n=4) to monitor clearance of senescent cells upon PTBP1 knockdown. Data represent mean $\pm$ SD; \*p < 0.05. (I – J) Long-term tumor development in mice upon injection with NRAS<sup>G12V</sup>\_shRen (n=10) and NRAS<sup>G12V</sup>\_shPTBP1 (n=9). Example of detected tumour with sonography in mice (I). Quantification of tumor nodules at endpoint. Data represent mean $\pm$ SD (J). One-way ANOVA (Bonferroni test) was used in (B), (E – H) and (J) to calculate statistical significance.

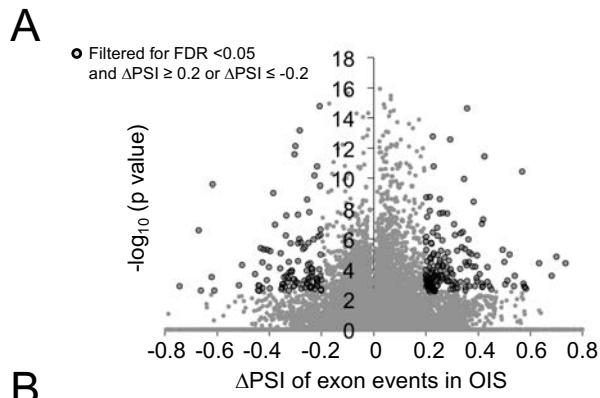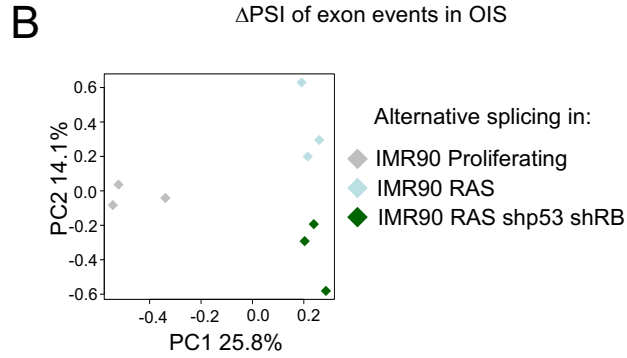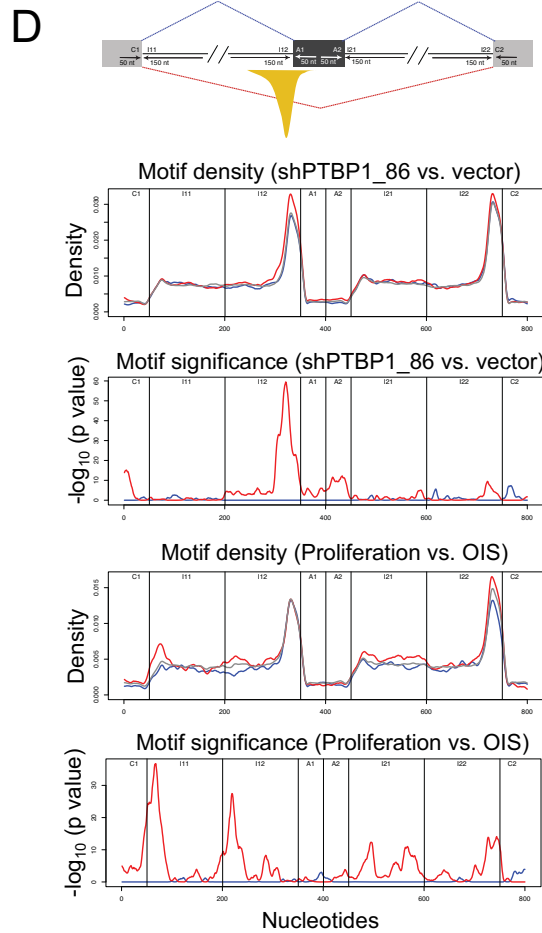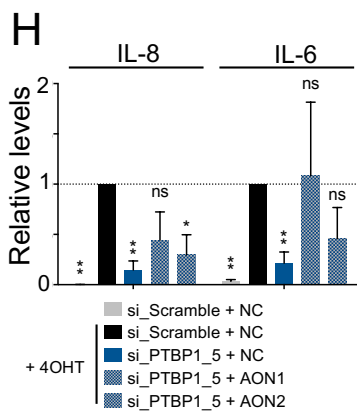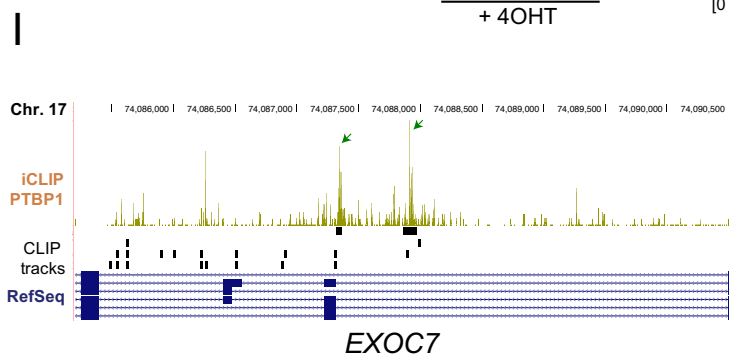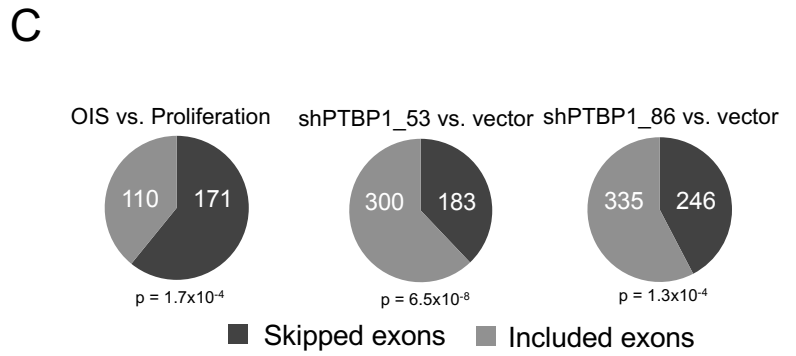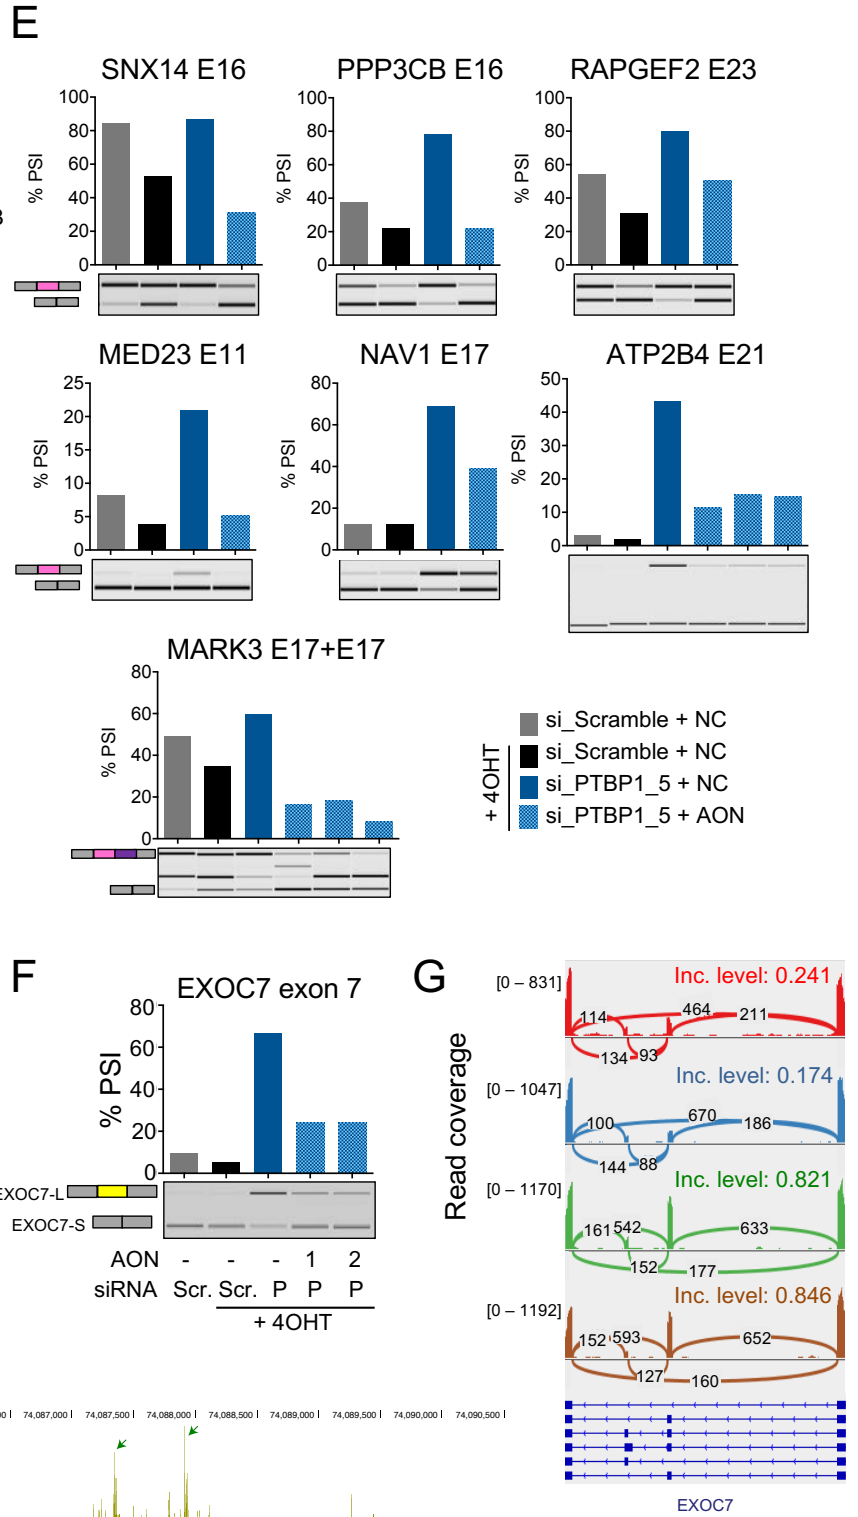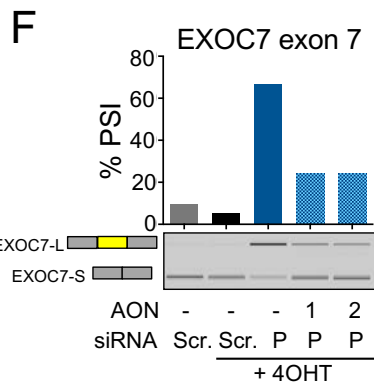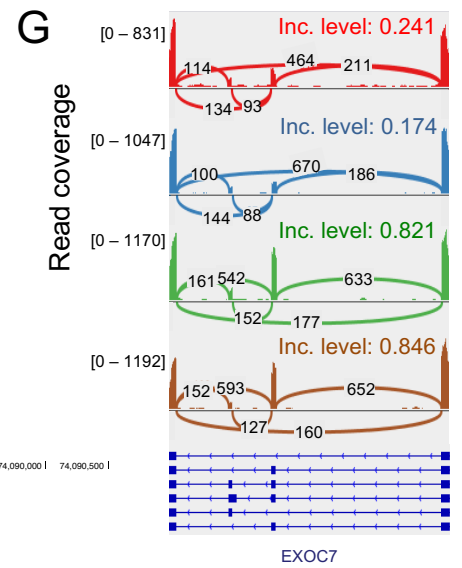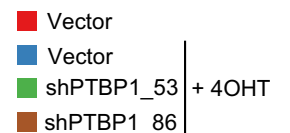

**Figure S7, related to Figure 7. Regulation of alternative splicing by PTBP1 controls the SASP.**

(A) Distribution of exon skipping events detected by RMATS and cut-offs used when comparing senescent to proliferating cells. (B) PCA of exon inclusion levels of datasets described in Tasdemir et al. (2016) to examine relative contribution of Ras activation and senescence. (C) Relative numbers of more skipped and more included amongst the significantly differentially spliced exons. (D) 1<sup>st</sup> panel: Scheme as in Figure 7B, top. 2<sup>nd</sup> and 4<sup>th</sup> panel: average (31bp moving window) PTBP1 RNA-binding motif density (# motifs per alternative splicing event) for exons with PSIs increasing upon PTBP1 knockdown (putatively repressed, red), exons with PSIs decreasing upon PTBP1 knockdown (putatively enhanced, blue), and exons with PSIs not altered upon PTBP1 knockdown (putatively not regulated, grey). 3<sup>rd</sup> and 5<sup>th</sup> panel: statistical significance for local PTBP1 RNA-binding motif enrichment in putatively repressed (red line) and putatively enhanced (blue line) exons. (E) Effect of AONs targeting the indicated exons on the splice-switch induced by PTBP1 knockdown. (F) Effect of AONs targeting EXOC7 exon 7 on the splice-switch induced by PTBP1 knockdown. (E and F) For mRNA analysis, IMR90 ER:RAS cells were transfected with AONs 2 days after 4OHT induction and RT-qPCR was performed 4 days after 4OHT induction. (G) Sashimi plot showing EXOC7 exon 7 splicing. RNA-seq data as in Figure 4A. Values are mean of 3 replicates. Blue boxes represent exons, empty blue box represents exon 7, and dotted lines represent introns (genome assembly hg19). (H) Timeline as in Figure 7F. Media were collected 6 days after 4OHT induction and SASP was evaluated by ELISA. Data represent mean $\pm$ SD (n=3, independent generation of CM); \*\*p < 0.01; ns, not significant. Comparisons to NC, si\_Scramble + NC+ 4OHT. Two-way ANOVA (Dunnett's test). (I) UCSC Genome Browser tracks visualizing public PTBP1 CLIP-seq data, around EXOC7 exon 7 (genome assembly hg19). Green arrows: PTBP1 binding sites potentially regulating exon 7 splicing. CLIP tracks, from top to bottom: HITS-CLIP PTBP1 HeLa; PAR-iCLIP PTBP1 293T; iCLIP PTBP1 293T dox-induc nSR100 KD; iCLIP PTBP1 293T dox-induc nSR100 OE.

**Table S3, related to Figure 7. Alternatively spliced transcripts selected for siRNA SASP screen.**

| <b>Alternatively spliced transcripts</b> |
|------------------------------------------|
| <i>ABLIM3</i>                            |
| <i>ANKRD27</i>                           |
| <i>APBA1</i>                             |
| <i>APH1A</i>                             |
| <i>ARVCF</i>                             |
| <i>ASAP2</i>                             |
| <i>ATP11C</i>                            |
| <i>ATP2B4</i>                            |
| <i>BTN3A2</i>                            |
| <i>C19orf12</i>                          |
| <i>CACNB1</i>                            |
| <i>COPZ2</i>                             |
| <i>CROCCP2</i>                           |
| <i>CTC-</i>                              |
| <i>205M6.2</i>                           |
| <i>CTNND1</i>                            |
| <i>DCLK2</i>                             |
| <i>DMD</i>                               |
| <i>DPP4</i>                              |
| <i>DZIP1</i>                             |
| <i>ENAH</i>                              |
| <i>EP400</i>                             |
| <i>EPB41L3</i>                           |
| <i>EVC</i>                               |
| <i>EXOC1</i>                             |
| <i>EXOC7</i>                             |
| <i>FAM190B</i>                           |
| <i>FAM208B</i>                           |
| <i>FAM21B</i>                            |
| <i>FBXO25</i>                            |
| <i>FERMT2</i>                            |
| <i>FLOT1</i>                             |
| <i>FMNL2</i>                             |
| <i>GABBR1</i>                            |
| <i>GAPVD1</i>                            |
| <i>GNB5</i>                              |
| <i>HPS4</i>                              |
| <i>ITGA6</i>                             |
| <i>KIAA1217</i>                          |
| <i>KIAA1715</i>                          |
| <i>KIF3A</i>                             |
| <i>KLC1</i>                              |
| <i>KRIT1</i>                             |



LOXL1-  
AS1  
LRRC27  
LRRFIP2  
MAGI2-  
AS3  
MARK3  
MCTP1  
MED23  
MEG3  
MICAL2  
MYL12A  
MYO1B  
NAV1  
OGDH  
PARP6  
PARPBP  
PBX1  
PDLIM5  
PICALM  
PITPNM2  
PIIP5K2  
PPP1R12B  
PPP3CB  
PRKD1  
PTBP2  
PXN  
R3HDM1  
RAPGEF2  
RAPH1  
RNF38  
ROBO3  
RPL26  
RPS24  
RTN4  
SEC31A  
SLMO2  
SMAP1  
SMTN  
SNX14  
SSFA2  
STAG3L3  
STX3  
SUCO  
SVIL  
TAPBP  
TBC1D24  
TNIK  
TPM1  
TRERF1

*TTC7A*  
*USP16*  
*VPS13D*  
*YIPF1*  
*ZNF484*

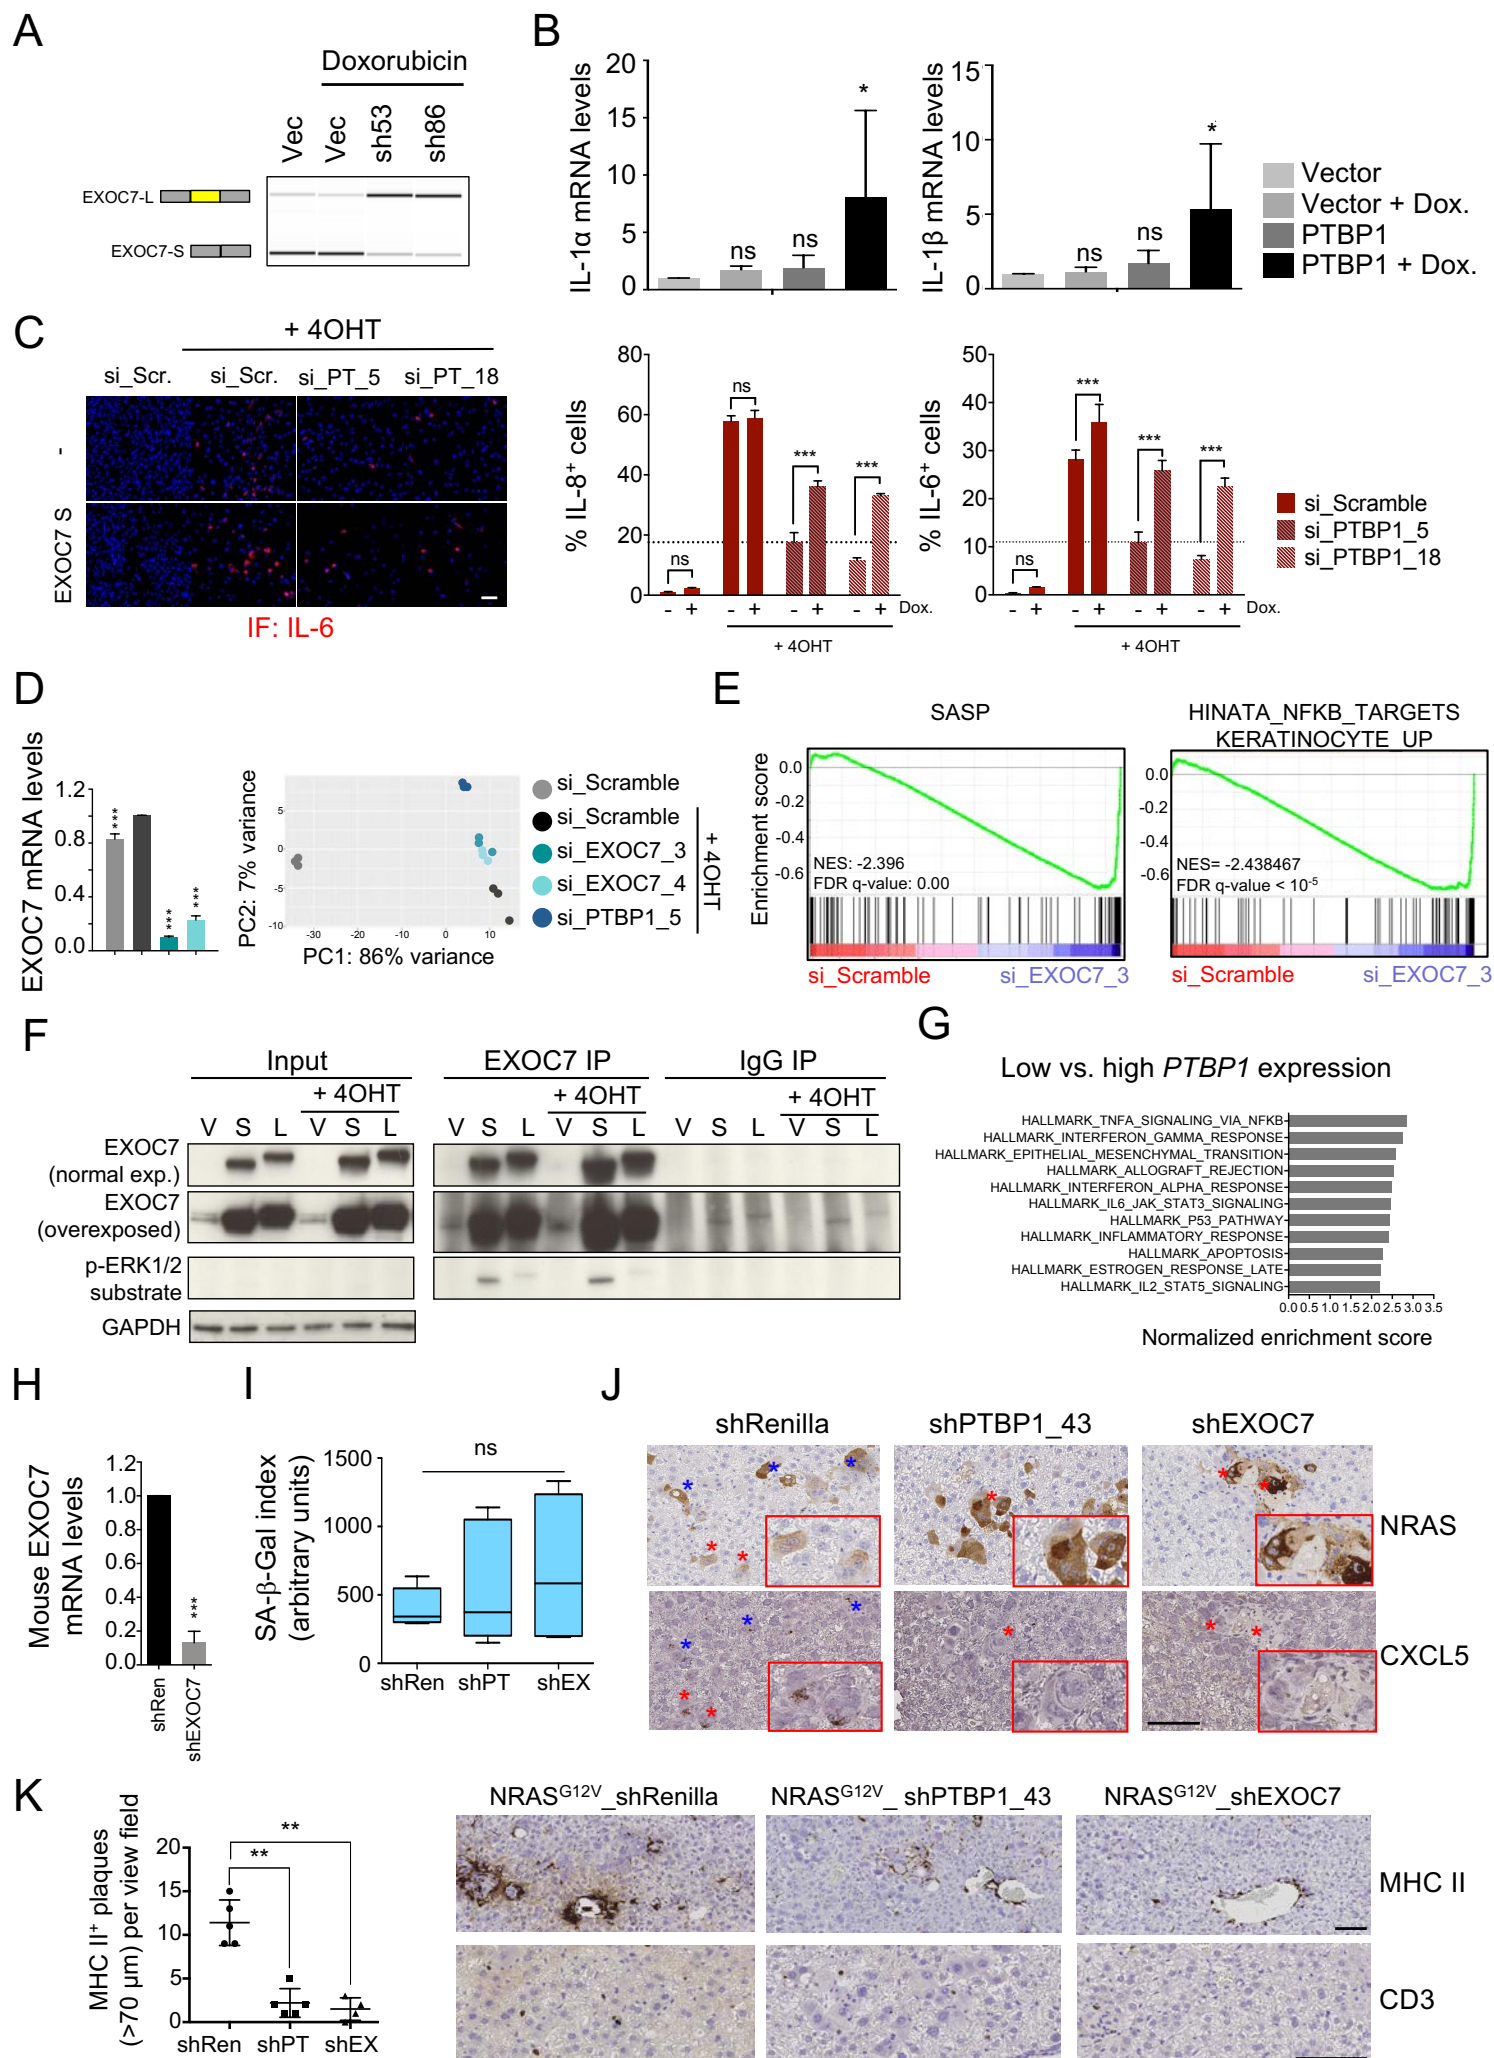

**Figure S8, related to Figure 8. PTBP1 regulates alternative splicing of EXOC7 to control the SASP.**

(A) EXOC7 splicing regulation by PTBP1 in other types of senescence. Doxorubicin-induced senescence is shown as an example. Alternative splicing analysis by RT-qPCR 8 days after doxorubicin treatment of IMR90 WT cells infected with the indicated pGIPz-based vectors. (B) SASP expression following PTBP1 overexpression in WT IMR90 cells. mRNA analysis by RT-qPCR 2 days after induction of PTBP1 expression with doxycycline (Dox). Data represent mean $\pm$ SD (n=5); \*p < 0.05; ns, not significant. Comparisons to Vector. One-way ANOVA (Dunnett's test). (C) Effect of EXOC7-S on the SASP downregulation caused by PTBP1 knockdown. Left: Representative IF images of IL-6 without doxycycline treatment (-) and with (EXOC7 S). Scale Bar: 100  $\mu$ m. Right: Quantification of IF analysis. Data represent mean $\pm$ SD (n=3); \*\*\*p < 0.001; ns, not significant. Two-way ANOVA (Bonferroni test). (D – E) SASP expression upon EXOC7 depletion. Left: mRNA analysis of EXOC7 by RT-qPCR. Data represent mean $\pm$ SD (n=3); \*\*\*p < 0.001; ns, not significant. Comparisons to si\_Scramble + 4OHT. One-way ANOVA (Dunnett's test). Right: PCA of the expression of the top 500 most variable genes in proliferating cells, senescent cells and senescent cells lacking EXOC7 or PTBP1. Each dot represents one of 3 independent replicates (D). NF- $\kappa$ B (left) and SASP (right) GSEA signatures in EXOC7 depleted cells + 4OHT compared to scramble transfected cells + 4OHT (E). (F) Comparison of EXOC7-S and EXOC7-L phosphorylation assessed by EXOC7 immunoprecipitation followed by immunoblotting as in Figure 8F. Here, including IP using IgG of the same species as EXOC7 antibody, serving as negative control for pulldown of EXOC7. (G) Top 11 hallmarks with NES > 2 and FDR < 0.05 in genes with expression positively correlating with PTBP1 expression in GTEx samples. (H) RT-qPCR analysis of mouse EXOC7 in MEFs stably infected an EXOC7-targeting shRNA. Data represent mean $\pm$ SD (n=3); \*\*\*p < 0.001. One-way ANOVA (Dunnett's test). (I – K) Experimental design in Figure 8J. Quantification of SA- $\beta$ -Galactosidase expression. Plots show median (line), upper and lower quartiles (boxes), and lines extending to highest and lowest observation (whiskers). ns, not significant. Comparisons to NRAS<sup>G12V</sup>\_shRenilla. One-way ANOVA (Dunnett's test) (I). Representative images of NRAS (top) and CXCL5 (bottom) positive cells on serial liver sections. NRAS measured by IHC and CXCL5 by *in situ* hybridisation. Asterisks denote NRAS<sup>+</sup> cells and the red insets zoom in the regions corresponding to red asterisks. Scale bar: 100  $\mu$ m (J). Effect of EXOC7

knockdown on immune infiltration. Quantification of infiltrated MHC II<sup>+</sup> cells forming large plaques (left) and representative images of IHC for MHC II and CD3 on liver sections. Data represent mean $\pm$ SD; \*\*p < 0.01. Comparisons to NRAS<sup>G12V</sup>\_shRenilla. One-way ANOVA (Bonferroni test). Scale bar: 100  $\mu$ m (K).

**Table S4, related to STAR METHODS. AON sequences used in this study.**

| <b>Gene</b>    | <b>Target Exon</b> | <b>AON Sequence</b>               |
|----------------|--------------------|-----------------------------------|
| <i>MARK3</i>   | MARK3 exon 16      | AAUCCUACCUUUUGAUAAACCUGAAUGACAUG  |
| <i>MARK3</i>   | MARK3 exon 17      | AUAUUCAGUUGGAAGCCUCAUGAACAGAAUGUA |
| <i>MARK3</i>   | MARK3 exon 17      | GUUCCUCUCAUAUUCAGUUGGAAGC         |
| <i>NAV1</i>    | NAV1 exon 17       | AUUGCAUCCUCUCCUCAGCCUGAAGAAG      |
| <i>PPP3CB</i>  | PPP3CB exon 16     | UUUUCAGCCUCAAUAGCCUCAACUGUG       |
| <i>RAPGEF2</i> | RAPGEF2 exon 23    | CAAACUCCGCCAUUUCUUCUCCUGUAA       |
| <i>RNF38</i>   | RNF38 exon 4       | GUAGAGAUGCUGAAUUGGCCCCGG          |
| <i>RNF38</i>   | RNF38 exon 4       | GAUGGCCAGGUAGAGAUGCUGAAUU         |
| <i>ATP2B4</i>  | ATP2B4 exon 21     | UAAAAGAGGCUCGCCGUCUGGAAUGUGUUA    |
| <i>ATP2B4</i>  | ATP2B4 exon 21     | GAAGAUUUGACUGGUGCAACUGCUACAUA     |
| <i>ATP2B4</i>  | ATP2B4 exon 21     | AUGUUCUGUCGCCUUAGGACUCCCUUAAAAG   |
| <i>EXOC7</i>   | EXOC7 exon 7       | UACUGUUUCAGAAGGUUCUGAGCCUUA C     |
| <i>EXOC7</i>   | EXOC7 exon 7       | UCUAGACCAUGCUGGGAAUACUGUU         |
| <i>MED23</i>   | MED23 exon 11      | CUGAGCAAUGUUCAAGGUCUAGAGCAU       |
| <i>R3HDM1</i>  | R3HDM1 exon 18     | AGACGACAGGUGCGCCAUGAGAAG          |
| <i>R3HDM1</i>  | R3HDM1 exon 18     | GGAUGUGAGAAAGAGAGCCUGUAGAUGAC     |
| <i>SNX14</i>   | SNX14 exon 16      | UUAGGCUACCUCUGCAAUAACAGGUAUGU     |
| <i>STX3</i>    | STX3 exon 10       | UUAAUUCAGCCCAACGGAAAGUCCAAU       |
| <i>STX3</i>    | STX3 exon 10       | UCAAUGCUGAAAUGCCCAGCAACAC         |
| N/A            | NC                 | CCUUCCCUGAAGGUUCCUCC              |

**Table S5, related to STAR METHODS. RT-qPCR primer sequences.**

| <b>Target</b>  | <b>Forward primer</b>    | <b>Reverse primer</b>     | <b>Use</b> |
|----------------|--------------------------|---------------------------|------------|
| <i>BRD8</i>    | TTGGGTATCAGTTAGCAGAGCA   | TCAACAGTTTCCACCACTTCTC    | Total      |
| <i>CCL20</i>   | GGCGAATCAGAAGCAGCAAGCAAC | ATTGGCCAGCTGCCGTGTGAA     | Total      |
| <i>EXOC7</i>   | GGAGACGCTGTCGTTTATCCG    | TGCAGCCTCTGTAGGTTCTCT     | Total      |
| <i>IL1A</i>    | AGTGCTGCTGAAGGAGATGCCTGA | CCCCTGCCAAGCACACCCAGTA    | Total      |
| <i>IL1B</i>    | TGCACGCTCCGGGACTCACA     | CATGGAGAACACCACTTGTTGCTCC | Total      |
| <i>IL6</i>     | CCAGGAGCCCAGCTATGAAC     | CCCAGGGAGAAGGCAACTG       | Total      |
| <i>IL8</i>     | GAGTGGACCACACTGCGCCA     | TCCACAACCCTCTGCACCCAGT    | Total      |
| <i>INHBA</i>   | CGGCGCTTCTGAACGCGATC     | GCTGTTCCCTGACTCGGCAAACGT  | Total      |
| <i>MMP1</i>    | TGTGGTGTCTCACAGCTTCC     | CGCTTTTCAACTTGCCTCCC      | Total      |
| <i>MMP3</i>    | TGTTTCGTTTTCTCCTGCCTGT   | CAGCAGCCCATTGGAATGCC      | Total      |
| <i>PP1A</i>    | ACTACGACCTTCTGCGACTAT    | AGTTCTCGGGTACTTGATCTT     | Total      |
| <i>PTBP1</i>   | AGCGCGTGAAGATCCTGTTT     | CAGGGGTGAGTTGCCGTAG       | Total      |
| <i>PTPN14</i>  | GGACAAATTCGCTAATGAGCCT   | TAATCGCCCTTCAAGCACATC     | Total      |
| <i>RPS14</i>   | CTGCGAGTGCTGTCAGAGG      | TCACCGCCCTACACATCAAAC     | Total      |
| <i>SKP1A</i>   | GACCATGTTGGAAGATTTGGGA   | TGCACCACTGAATGACCTTTT     | Total      |
| <i>TMEM219</i> | ACGGTCCAGACAGGAACAAGA    | CTGAGCAGGATATGGGTGGC      | Total      |
| <i>UBE2V2</i>  | AGTTCCTCGTAATTTTCGCTTGT  | CCCCAGCTAACTGTACCGT       | Total      |
| <i>VEGFC</i>   | AGAGAACAGGCCAACCTCAA     | TGGCATGCATTGAGTCTTTC      | Total      |
| <i>ATP2B4</i>  | GATCCTCTGGTTCCGGGG       | GCTGTGGATGGACTTTTGGT      | AS         |
| <i>EXOC7</i>   | TACTCCCCTGCTATCCCCAA     | ATGTAGGCATCGGTCTCCAC      | AS         |
| <i>MARK3</i>   | CTGTCCCATGAAGCCACAC      | TTTCATGCTCCAGGTGAAGC      | AS         |
| <i>MED23</i>   | GTTGAGATATGTATTGGAGCAGC  | TCAGATCGCTCCATGGCATA      | AS         |
| <i>NAV1</i>    | CCACGGACGATGTTACG        | ATTCACCAGGCTCTGCTCAA      | AS         |
| <i>PPP3CB</i>  | AGGAGAGTGAAAGTGTGCTGA    | TGTACAGCATCTTCCGAGGT      | AS         |
| <i>RAPGEF2</i> | ATGGCTTCAGTGAACATGGA     | GCTTCACTTTTCGAGCCATTG     | AS         |
| <i>R3HDM1</i>  | TGGAAGCAGCAAAAGCATAGG    | TGGTTGTTGAGTCATAGGAGGA    | AS         |
| <i>SNX14</i>   | GCAGAATCACCAACACGCAA     | GCAACATAGCTCCCTCCATTG     | AS         |
| <i>STX3</i>    | GAAGGCACGAGATGAAACGA     | CATCTGAAGACAAGGGTGGC      | AS         |

Total, total mRNA

AS, alternative splicing
